# Supplementary material for: Flow-induced structure and rheological properties of multiwall carbon nanotube/polydimethylsiloxane composites
Source: Royal Society of Chemistry journal article supplement (doi:10.1039/c4ra10091c), 2014-01-01
Supplement: c4ra10091c1.pdf [file c4ra10091c1.pdf]

Electronic Supplementary Information for

**Flow-induced structure and properties of multiwall carbon  
nanotube/polydimethylsiloxane composites**

Ran Niu,<sup>a,b</sup> Jiang Gong,<sup>a,b</sup> Donghua Xu,<sup>a,\*</sup> Tao Tang<sup>a</sup> and Zhao-Yan Sun<sup>a,\*</sup>

<sup>a</sup> State Key Laboratory of Polymer Physics and Chemistry, Changchun Institute of Applied Chemistry, Chinese Academy of Sciences, Changchun 130022, P. R. China

<sup>b</sup> University of Chinese Academy of Sciences, Beijing 100039, P. R. China

\*To whom correspondence should be addressed.

Tel.: +86 (0) 431 85262896.

Fax: +86 (0) 431 85262969.

E-mail: dhxu@ciac.ac.cn and zysun@ciac.ac.cn

|                                                                                                                                           |    |
|-------------------------------------------------------------------------------------------------------------------------------------------|----|
| Fig. S1: TEM images and length distributions of MWNTs .....                                                                               | 3  |
| Figs. S2 and S3: Viscosity and normal stress difference measured by different geometries .....                                            | 3  |
| Figs. S4–S6: Frequency sweep results of MWNT/PDMS composites.....                                                                         | 5  |
| Figs. S7 and S8: Influence of PDMS molecular weight on the rheological properties of MWNT/PDMS composites .....                           | 8  |
| Fig. S9: Influence of aspect ratio of MWNT on the $\Delta N$ of MWNT/PDMS composites .....                                                | 10 |
| Fig. S10: Normal stress differences versus shear rate for 16 wt % MWNT2/P6k measured by different geometries .....                        | 10 |
| Figs. S11–S14: Influence of MWNT concentration on the viscosity of MWNT/PDMS composites .....                                             | 11 |
| Fig. S15: Viscosity of 0.5 wt % MWNT2/P63k under different heights of gap.....                                                            | 14 |
| Figs. S16–S18: Influence of MWNT concentration on the $\Delta N$ of MWNT/PDMS composites .....                                            | 15 |
| Figs. S19–S23: Structural change under shear of low concentration MWNT/PDMS composites .....                                              | 18 |
| Figs. S24 and S25: Normal stress differences of 1 wt % MWNT0/P28k and 0.5 wt % MWNT0/P63k composites under different heights of gap ..... | 19 |
| Fig. S26: Structures of 0.5 wt % MWNT0/P117k under different heights of gap.....                                                          | 20 |
| Tables S1 and S2 Mean aggregate size of MWNT/PDMS composites under static ...                                                             | 21 |
| Fig. S27: Steady shear results of pure PDMS.....                                                                                          | 22 |

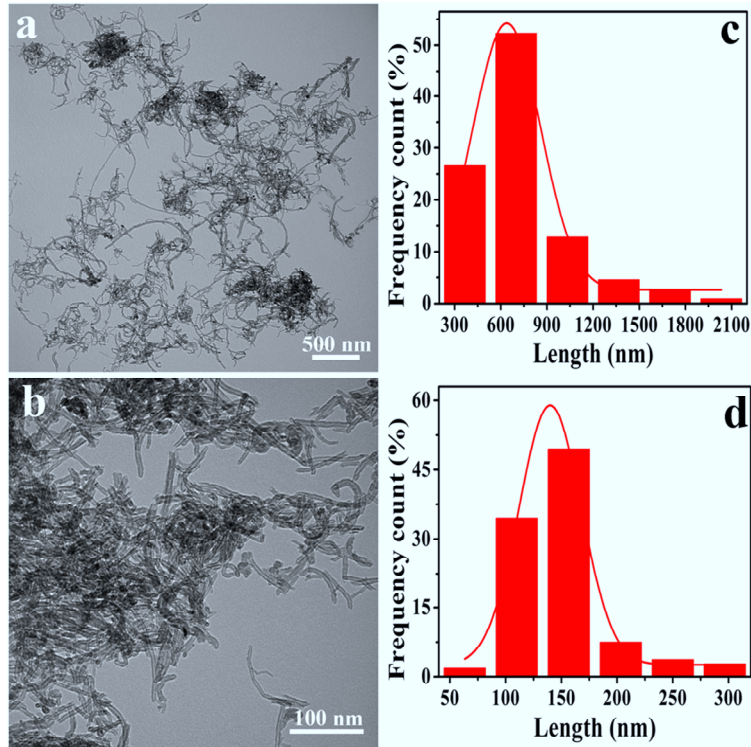

**Fig. S1** TEM images and length distributions of MWNT2 (a and c) and MWNT6 (b and d).

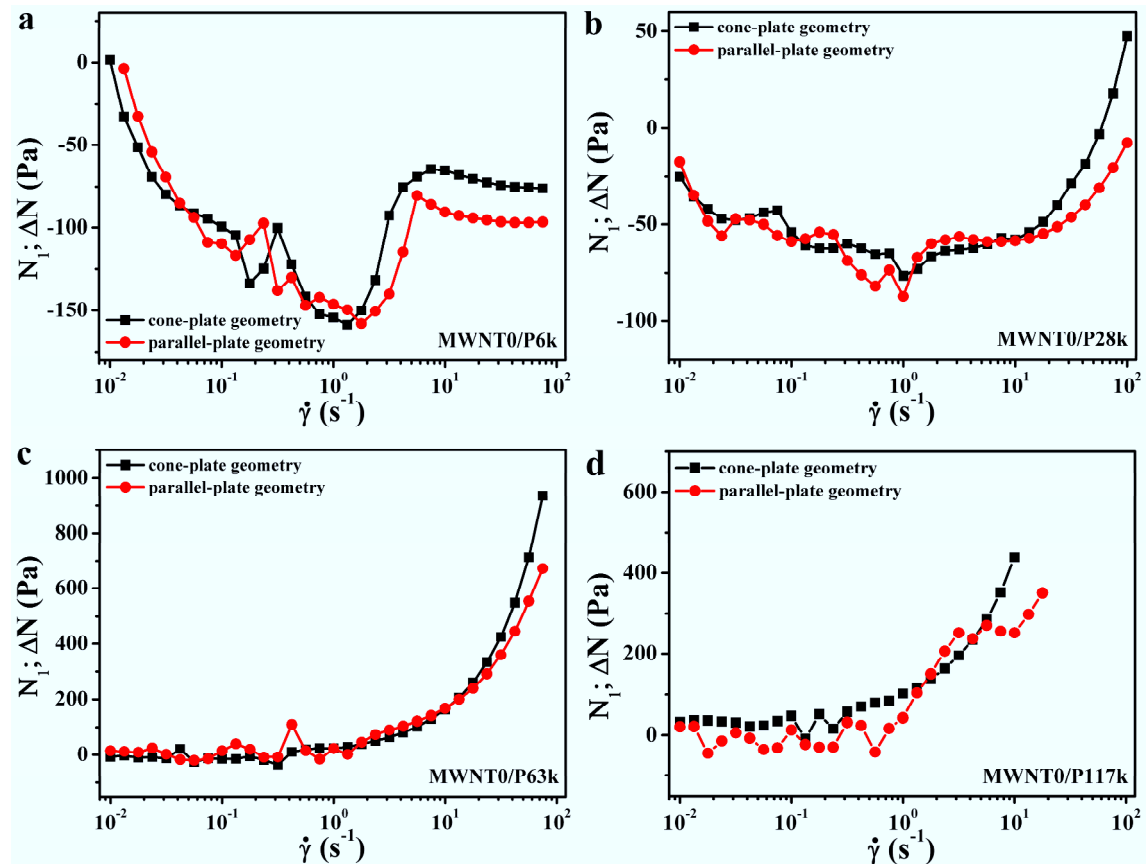

**Fig. S2** Normal stress difference ( $N_1$  and  $\Delta N$ ) versus shear rate measured by cone-plate and parallel-plate geometries for 2 wt % MWNT0/PDMS composites.

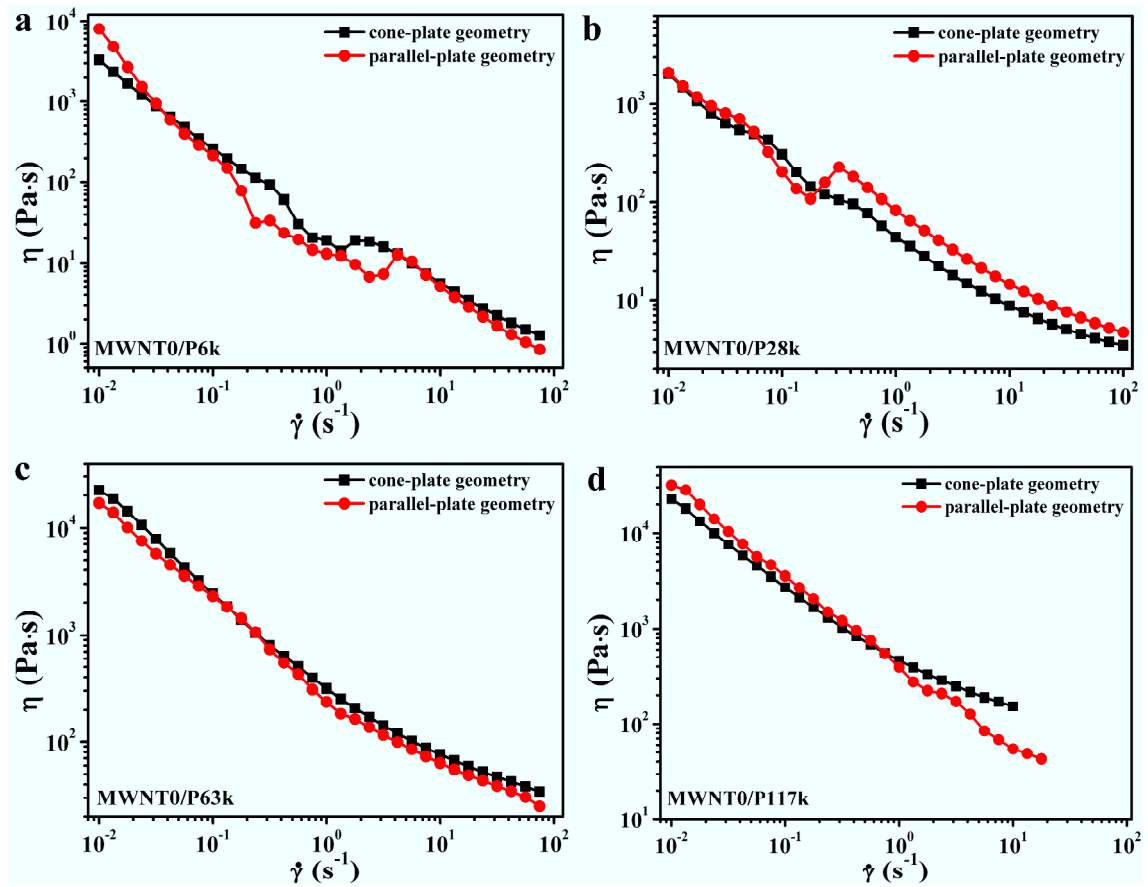

**Fig. S3** Viscosity versus shear rate measured by cone-plate and parallel-plate geometries for 2 wt % MWNT0/PDMS composites.



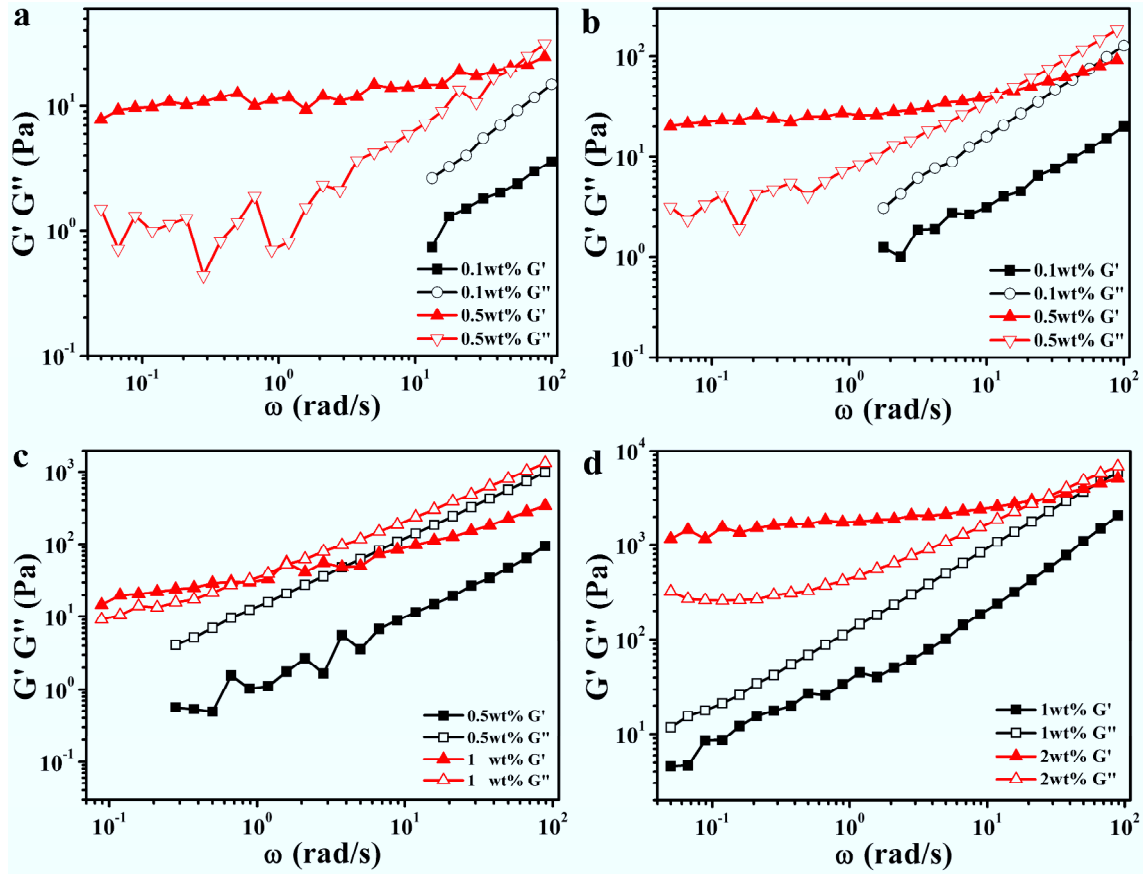

**Fig. S4** Frequency sweep results of MWNT0/P6k (a), MWNT0/P28k (b), MWNT0/P63k (c) and MWNT0/P117k composites (d).

For 0.5 wt % MWNT0/P6k and 0.5 wt % MWNT0/P28k, the storage modulus ( $G'$ ) is larger than loss modulus ( $G''$ ), indicating the formation of network structure.<sup>S1-S3</sup> However, for 0.1 wt % MWNT0/P6k and 0.1 wt % MWNT0/P28k, the  $G'$  and  $G''$  at low frequency cannot be accurately measured as the torque is close to the resolution limit. At high frequency,  $G''$  is larger than  $G'$ , suggesting that no network structure forms.<sup>S1-S3</sup>

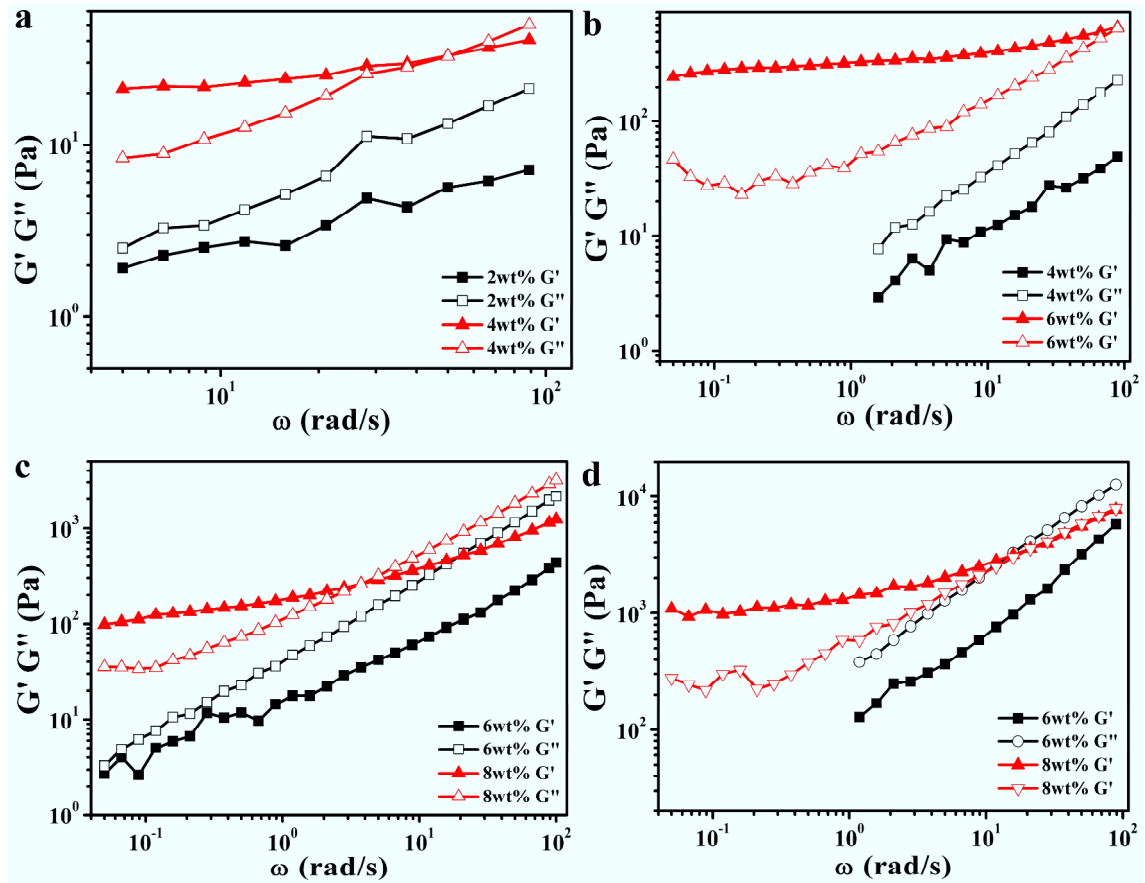

**Fig. S5** Frequency sweep results of MWNT2/P6k (a), MWNT2/P28k (b), MWNT2/P63k (c) and MWNT2/P117k composites (d).

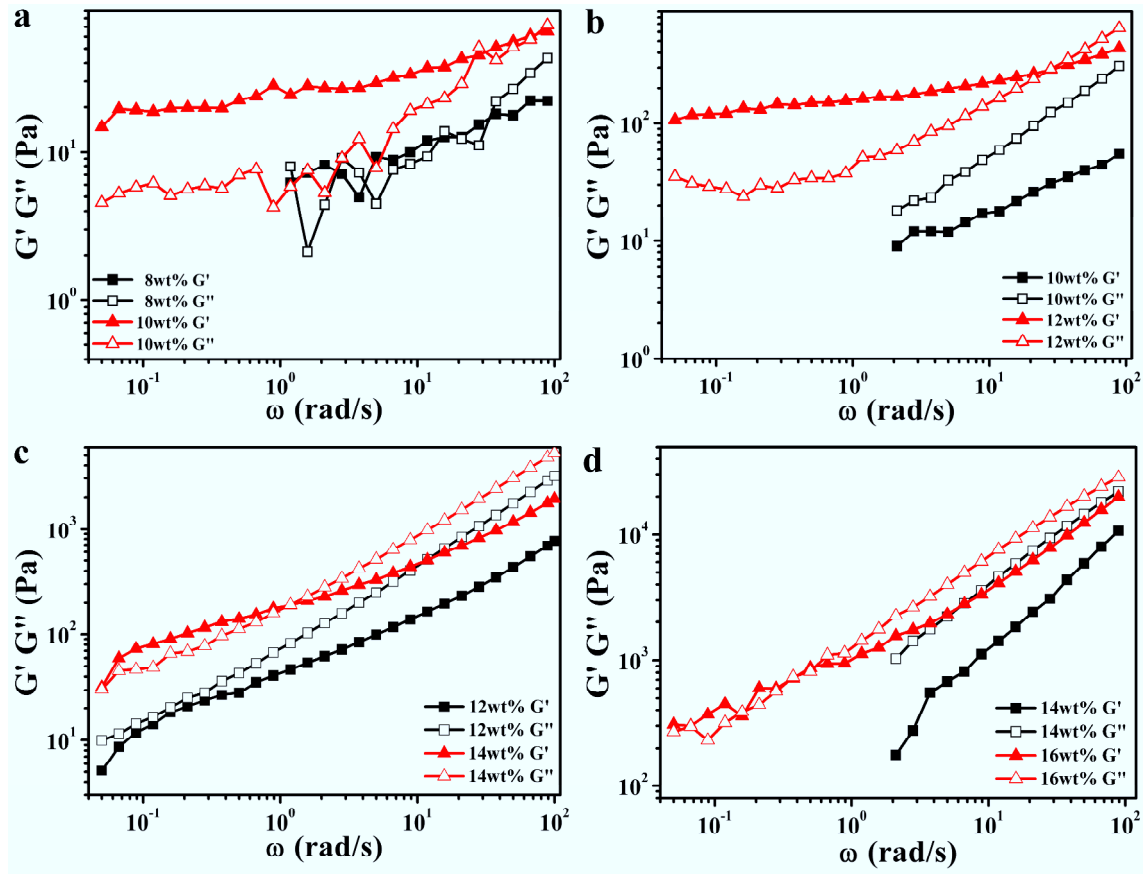

**Fig. S6** Frequency sweep results of MWNT6/P6k (a), MWNT6/P28k (b), MWNT6/P63k (c) and MWNT6/P117k composites (d).

## Influence of PDMS molecular weight on the rheological properties of MWNT/PDMS composites

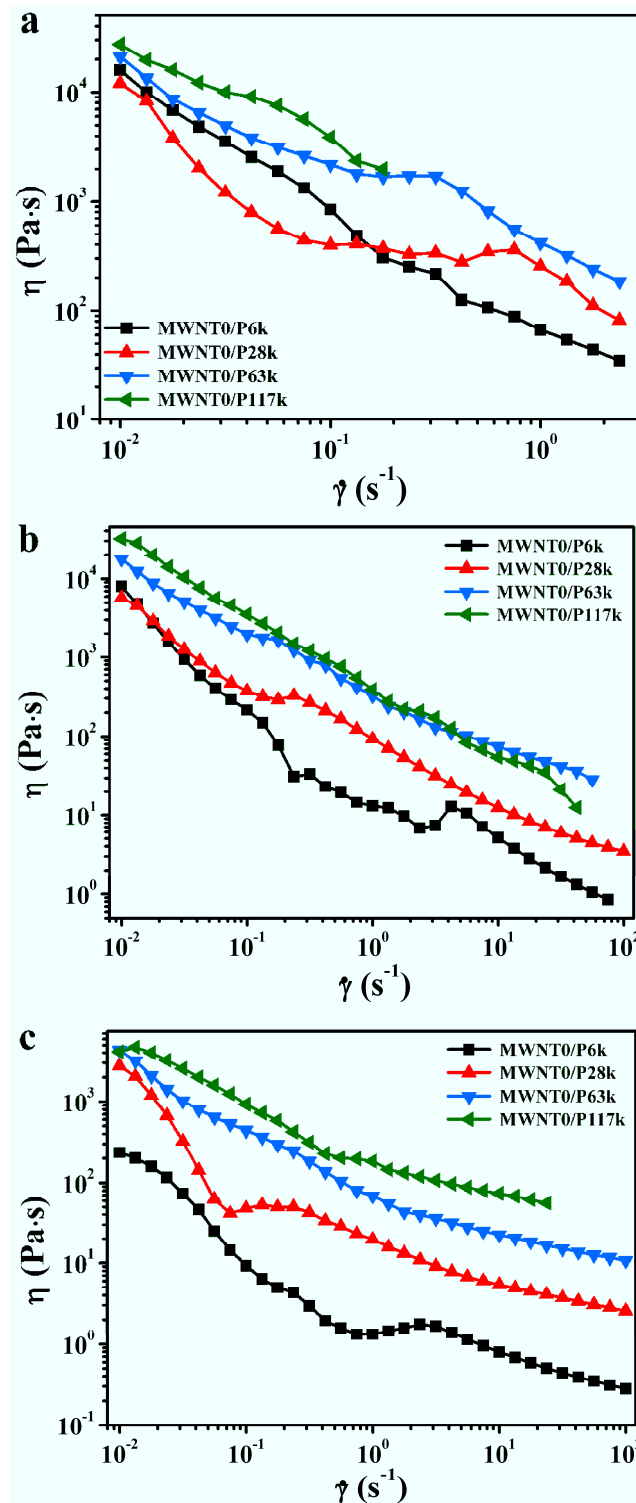

**Fig. S7** Viscosity ( $\eta$ ) versus shear rate ( $\dot{\gamma}$ ) for MWNT0/PDMS composites with 4 wt % MWNT0 (a), 2 wt % MWNT0 (b) and 1 wt % MWNT0 (c). The gap used in the rheological experiments is about 0.9 mm.

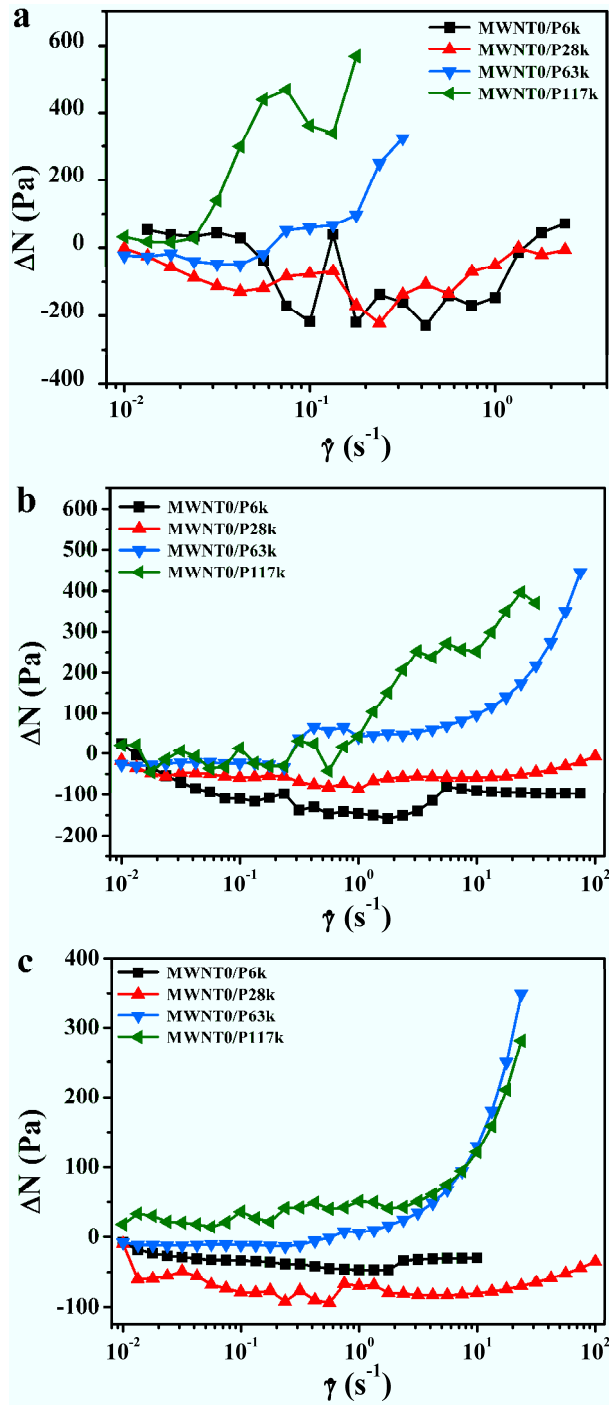

**Fig. S8** Normal stress differences ( $\Delta N$ ) versus shear rate ( $\dot{\gamma}$ ) for MWNT0/PDMS composites with 4 wt % MWNT0 (a), 2 wt % MWNT0 (b) and 1 wt % MWNT0 (c). The gap used in the rheological experiments is about 0.9 mm.

## Influence of MWNT aspect ratio on the rheological properties of MWNT/PDMS composites

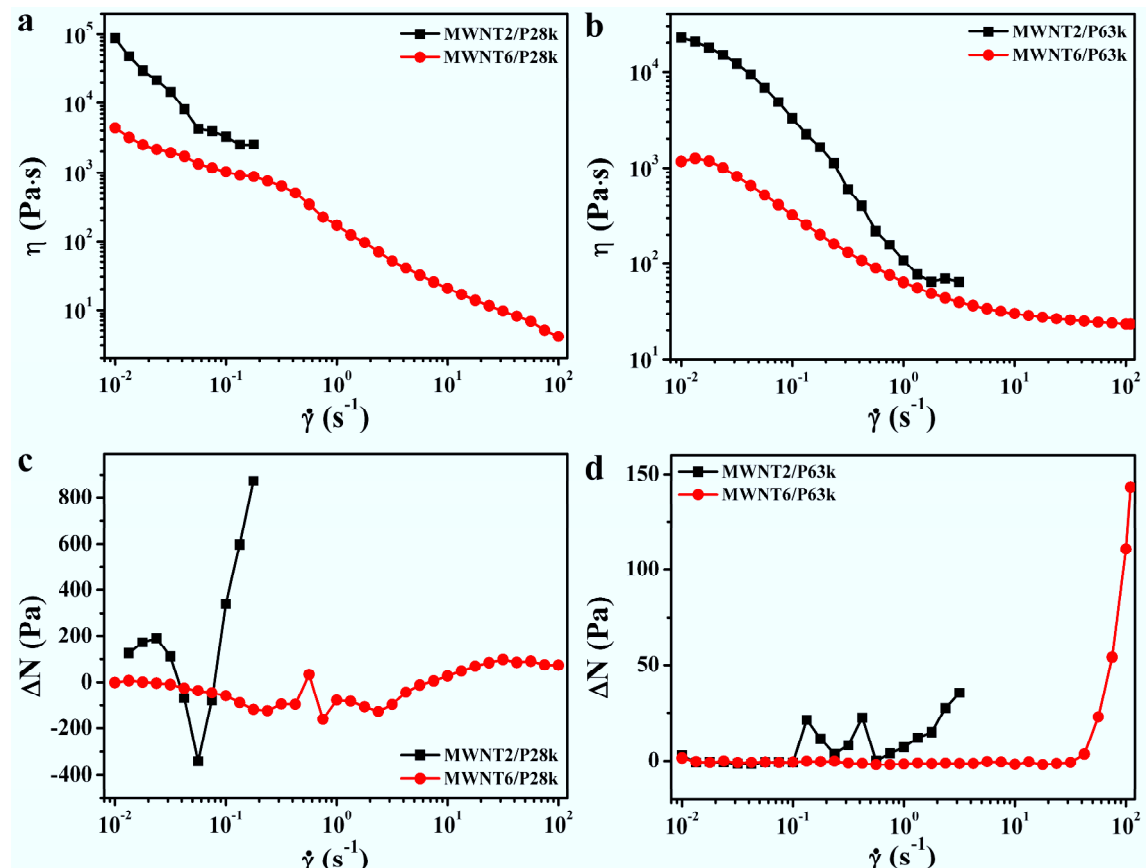

**Fig. S9** Viscosity ( $\eta$ ) and normal stress differences ( $\Delta N$ ) versus shear rate ( $\dot{\gamma}$ ) for 16 wt % MWNT2/P28k and MWNT6/P28k (a and c); and 16 wt % MWNT2/P63k and MWNT6/P63k composites (b and d). The gap used in the rheological experiments is about 0.9 mm.

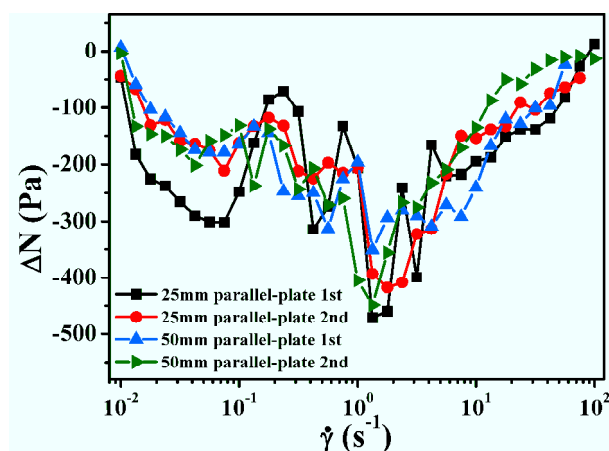

**Fig. S10** Normal stress differences ( $\Delta N$ ) versus shear rate for 16 wt % MWNT2/P6k composites measured by different geometries.

## Influence of concentration of MWNT on the rheological properties of MWNT/PDMS composites

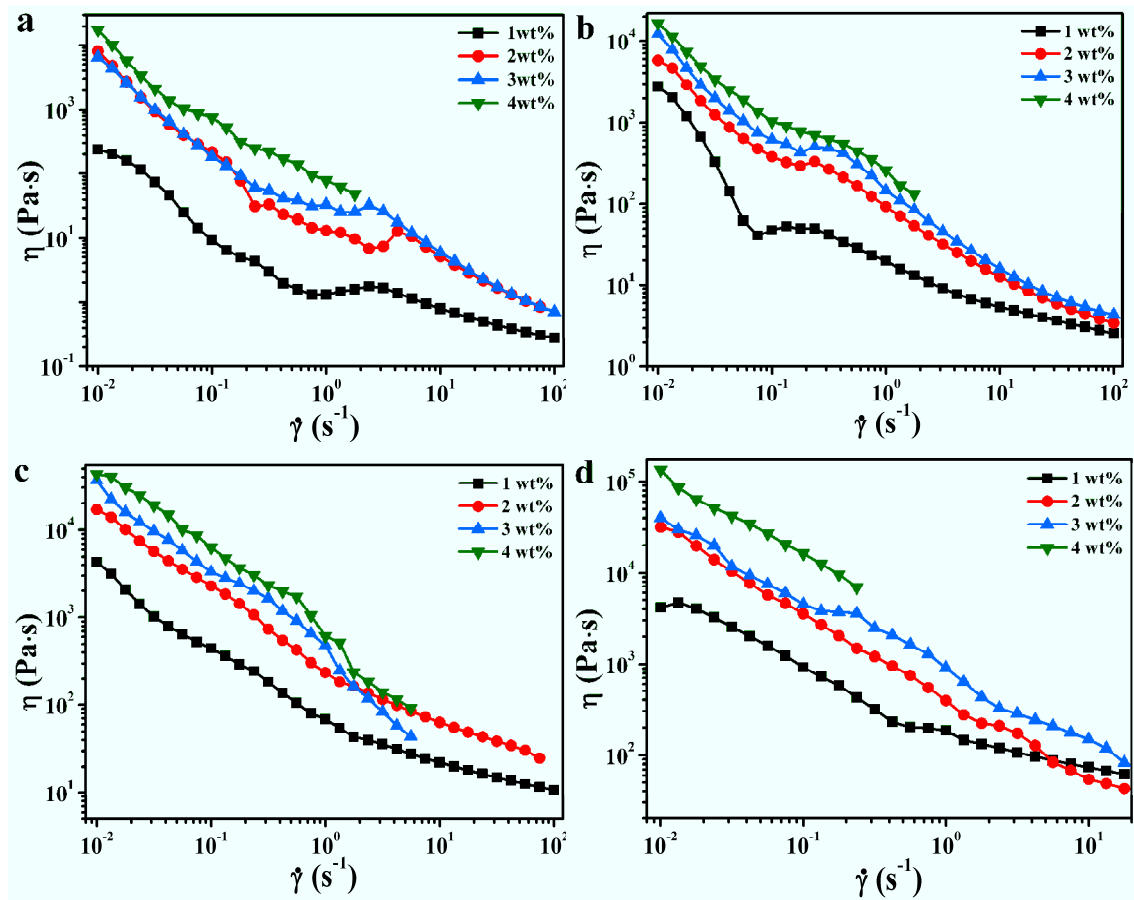

**Fig. S11** Viscosity ( $\eta$ ) versus shear rate ( $\dot{\gamma}$ ) for MWNT0/P6k (a), MWNT0/P28k (b), MWNT0/P63k (c) and MWNT0/P117k composites (d) with different concentrations of MWNT0. The gap used in the rheological experiments is about 0.9 mm.

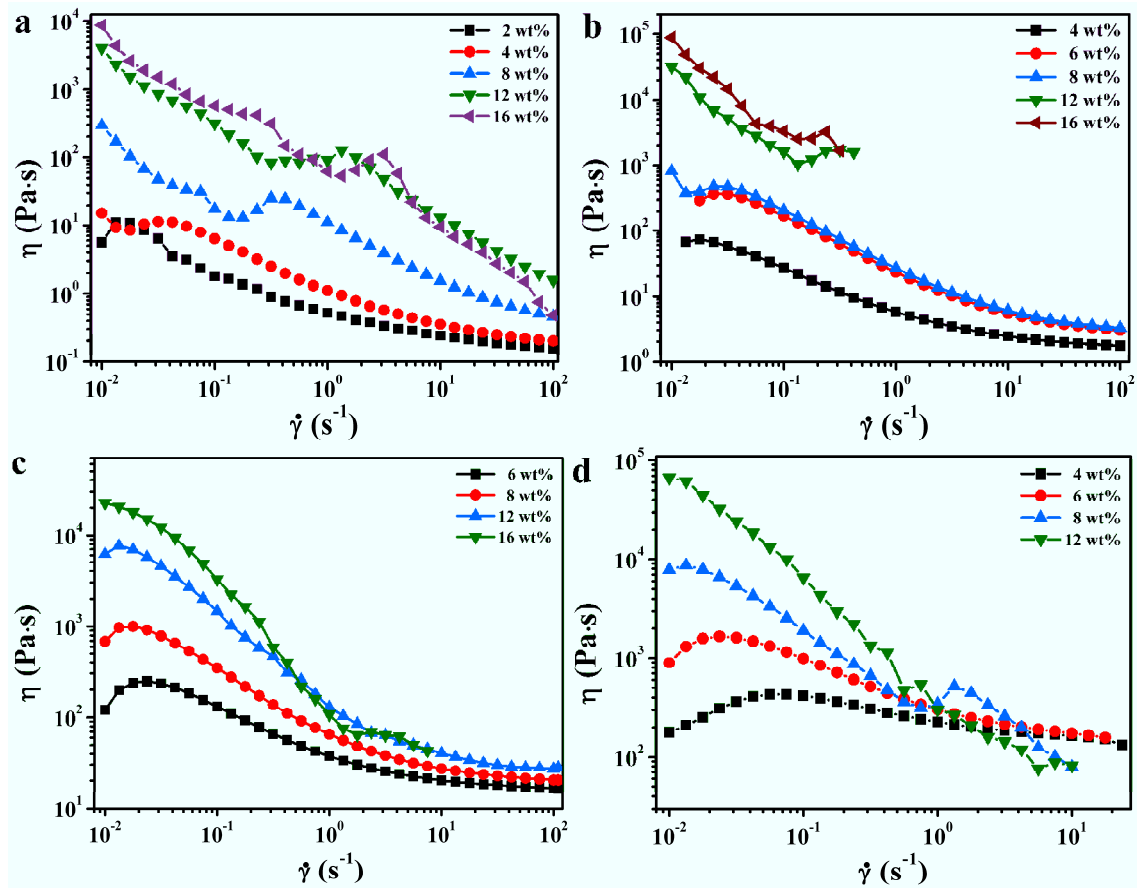

**Fig. S12** Viscosity ( $\eta$ ) versus shear rate ( $\dot{\gamma}$ ) for MWNT2/P6k (a), MWNT2/P28k (b), MWNT2/P63k (c) and MWNT2/P117k composites (d) with different concentrations of MWNT2. The gap in the rheological experiments is about 0.9 mm.



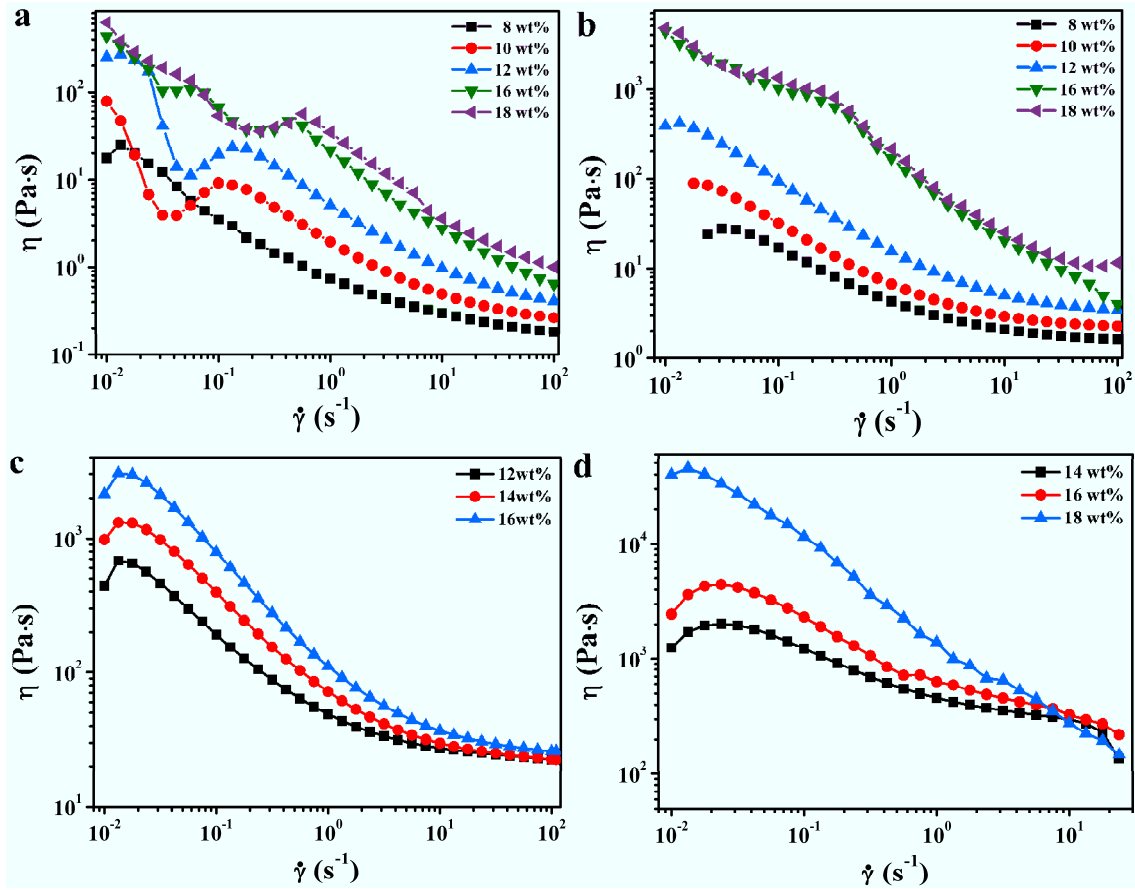

**Fig. S13** Viscosity ( $\eta$ ) versus shear rate ( $\dot{\gamma}$ ) for MWNT6/P6k (a), MWNT6/P28k (b), MWNT6/P63k (c) and MWNT6/P117k composites (d) with different concentrations of MWNT6. The gap in the rheological experiments is about 0.9 mm.

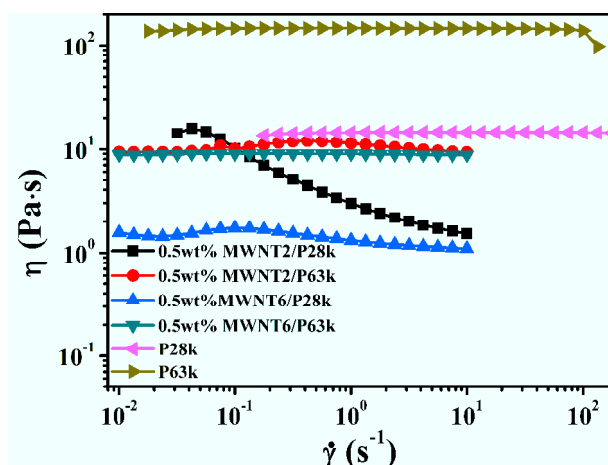

**Fig. S14** Viscosity ( $\eta$ ) versus shear rate ( $\dot{\gamma}$ ) for MWNT2/P28k, MWNT2/P63k, MWNT6/P28k and MWNT6/P63k composites with 0.5 wt % MWNTs. The gap in the rheological experiments is about 150  $\mu\text{m}$ .

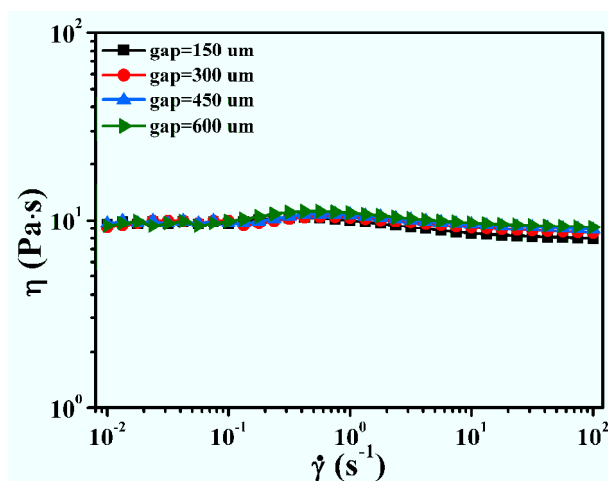

**Fig. S15** Viscosity ( $\eta$ ) versus shear rate ( $\dot{\gamma}$ ) for 0.5 wt % MWNT2/P63k composites measured at different heights of gap.

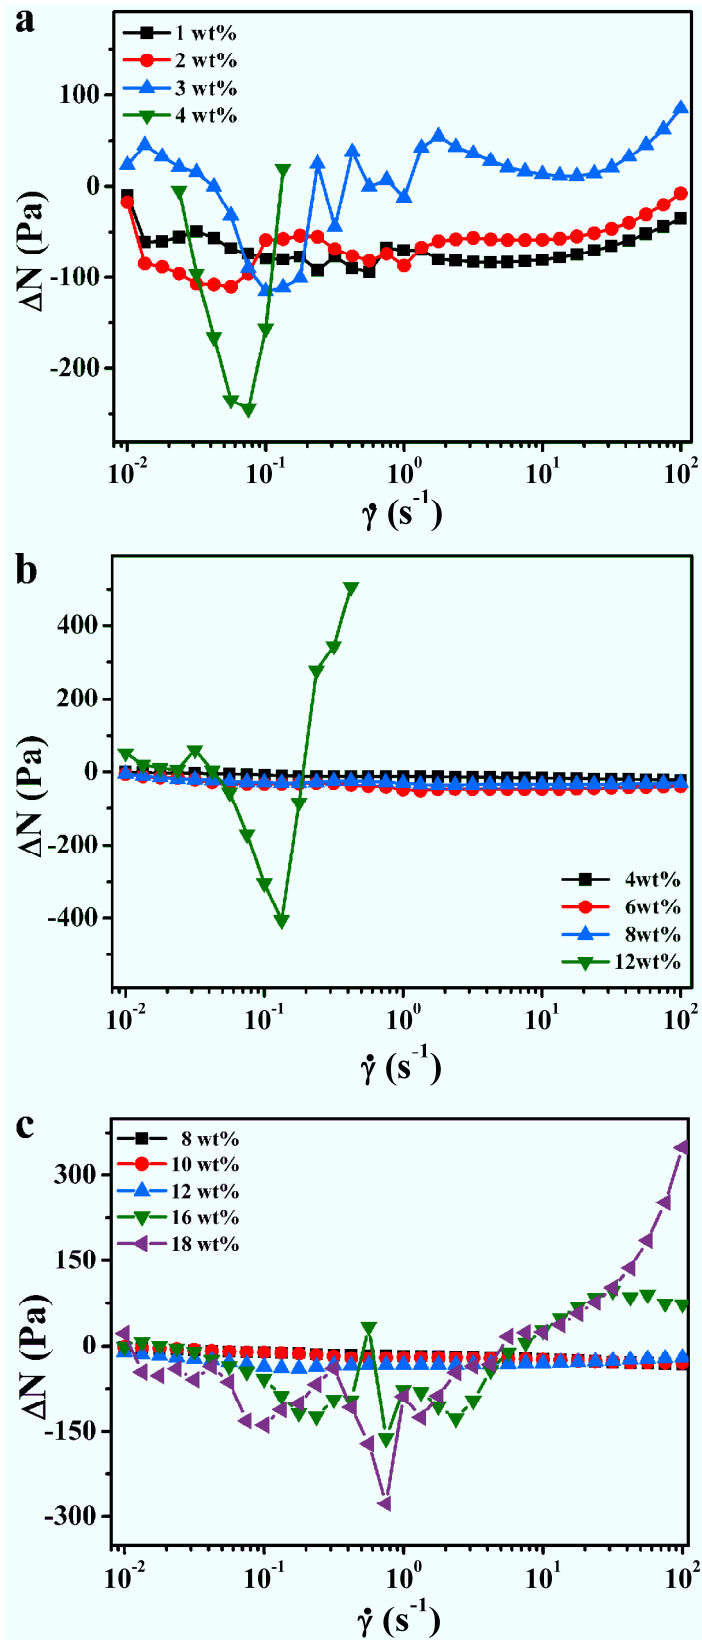

**Fig. S16** Normal stress differences ( $\Delta N$ ) versus shear rate ( $\dot{\gamma}$ ) for MWNT0/P28k (a), MWNT2/P28k (b) and MWNT6/P28k composites (c) with different concentrations of MWNT. The gap in the rheological experiments is about 0.9 mm.

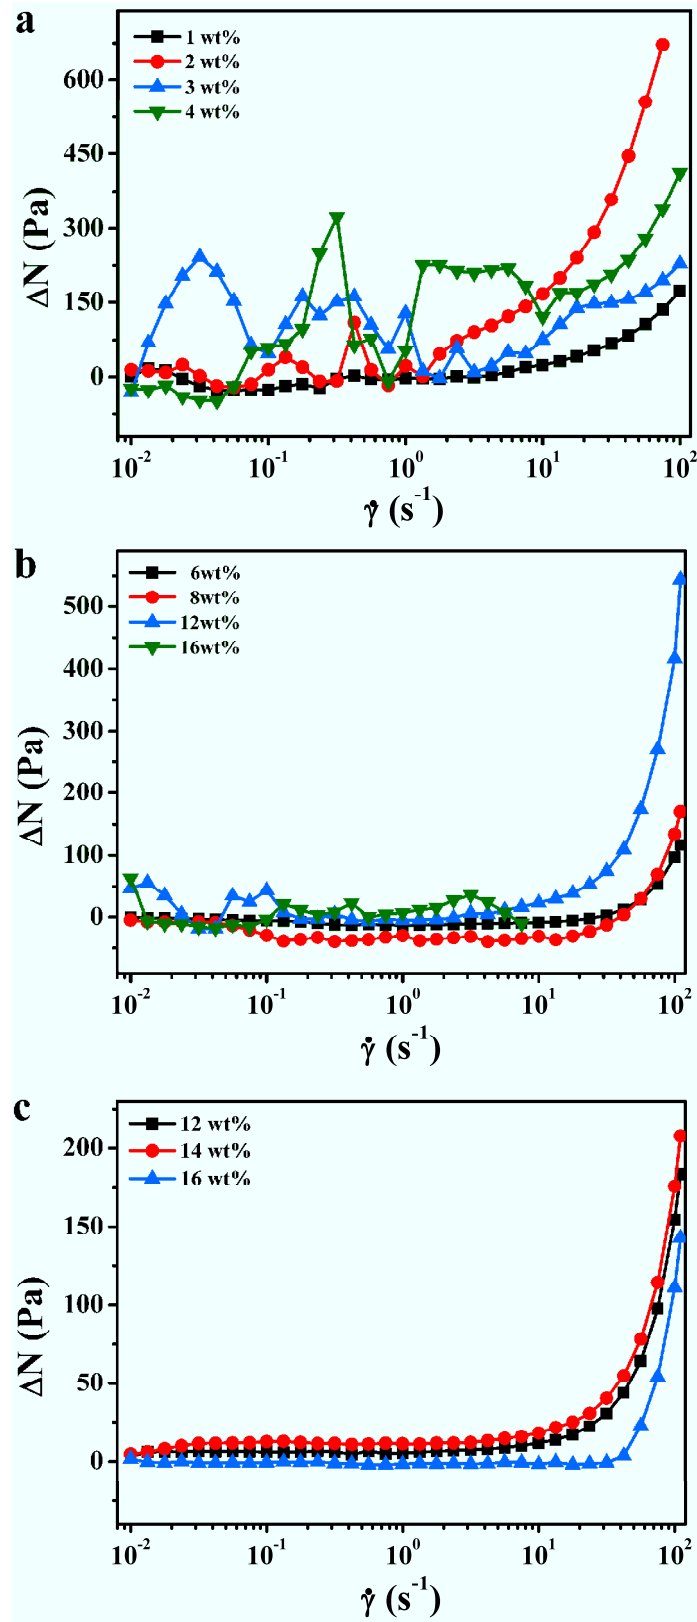

**Fig. S17** Normal stress differences ( $\Delta N$ ) versus shear rate ( $\dot{\gamma}$ ) for MWNT0/P63k (a), MWNT2/P63k (b) and MWNT6/P63k composites (c) with different concentrations of MWNT. The gap in the rheological experiments is about 0.9 mm.

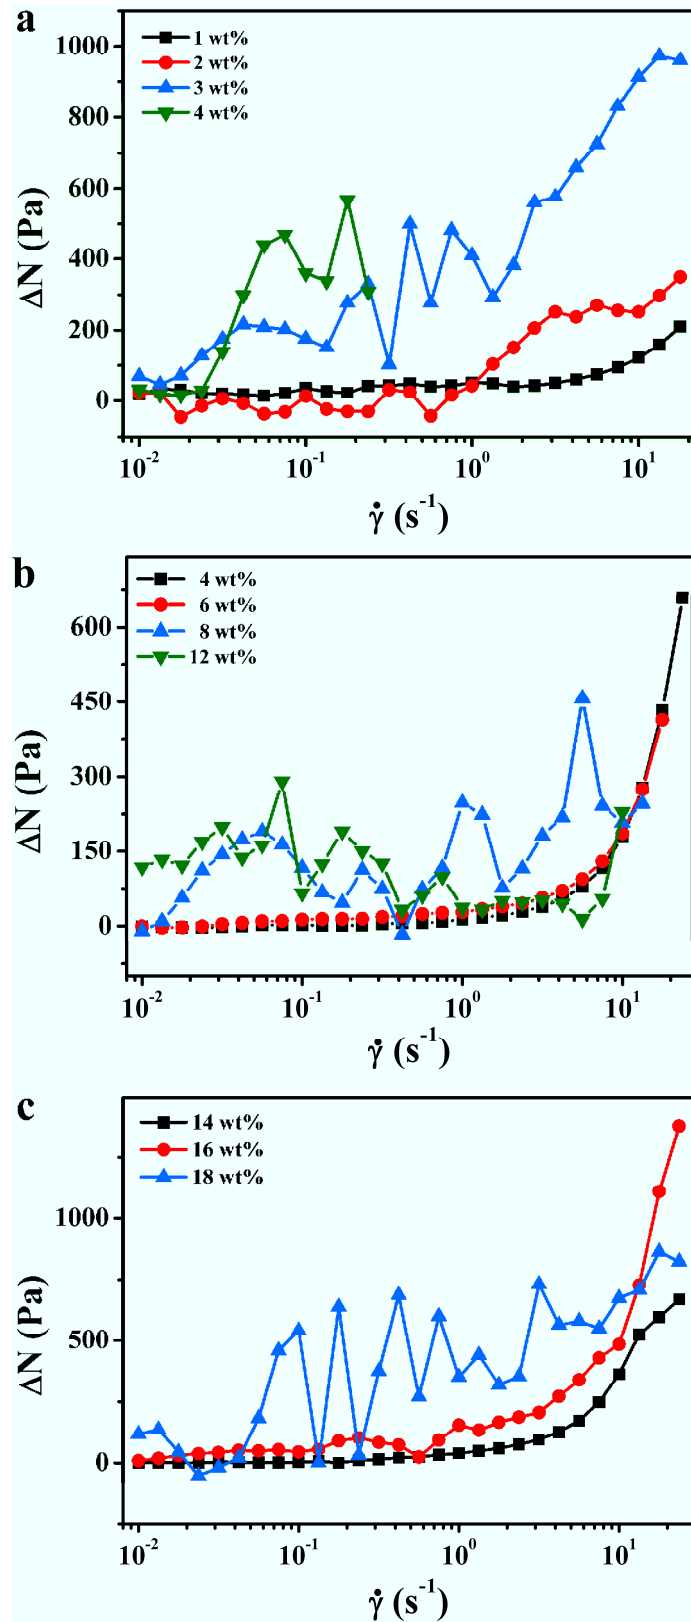

**Fig. S18** Normal stress differences ( $\Delta N$ ) versus shear rate ( $\dot{\gamma}$ ) for MWNT0/P117k (a), MWNT2/P117k (b) and MWNT6/P117k composites (c) with different concentrations of MWNT. The gap in the rheological experiments is about 0.9 mm.

## Structural change under shear for MWNT/PDMS composites

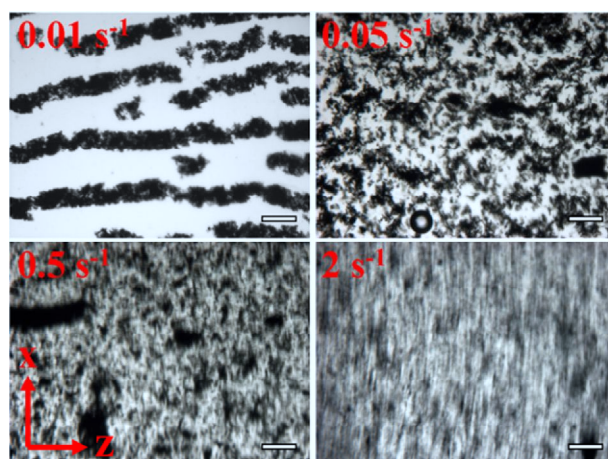

**Fig. S19** Structures of 0.5 wt % MWNT0/P28k under different shear rates. The scale bars are  $150 \mu\text{m}$  and the gap is  $150 \mu\text{m}$ . Photos are taken after shearing for about 45 s.

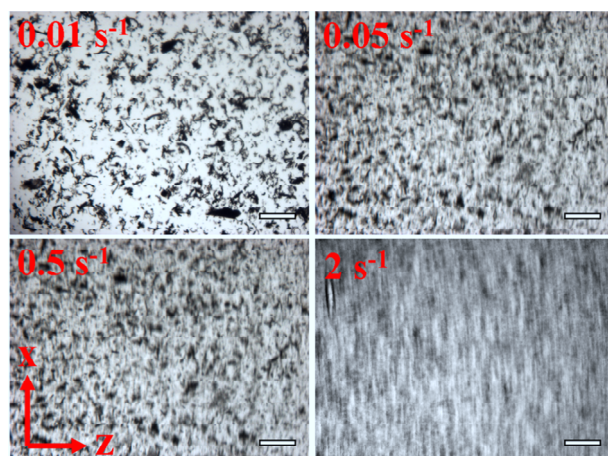

**Fig. S20** Structures of 0.5 wt % MWNT0/P63k under different shear rates. The scale bars are  $150 \mu\text{m}$  and the gap is  $150 \mu\text{m}$ . Photos are taken after shearing for about 45 s.

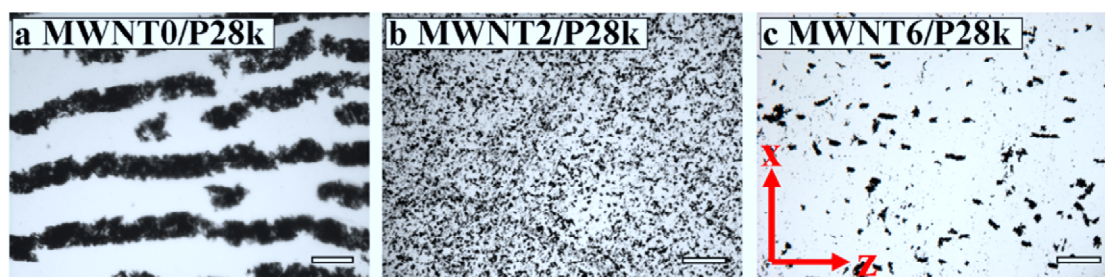

**Fig. S21** Structures of 0.5 wt % MWNT0/P28k (a), 0.5 wt % MWNT2/P28k (b) and 0.5 wt % MWNT6/P28k (c) under a shear rate of  $0.01 \text{ s}^{-1}$ . The scale bars are  $150 \mu\text{m}$  and the gap is  $150 \mu\text{m}$ . Photos are taken after shearing for about 45 s.



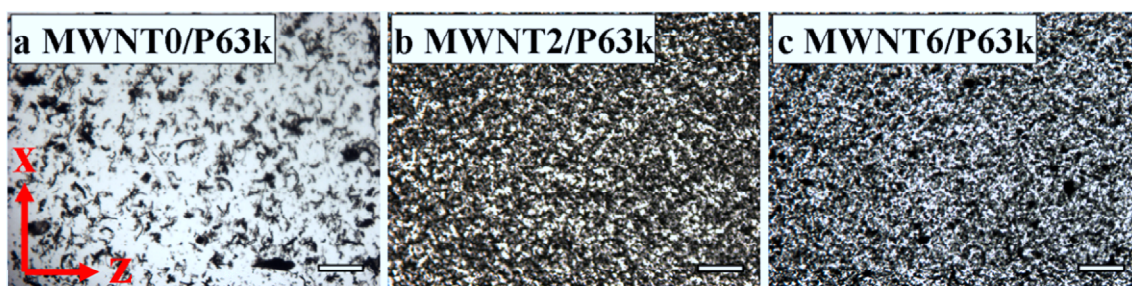

**Fig. S22** Structures of 0.5 wt % MWNT0/P63k (a), 0.5 wt % MWNT2/P63k (b) and 0.5 wt % MWNT6/P63k (c) under a shear rate of  $0.01 \text{ s}^{-1}$ . The scale bars are  $150 \mu\text{m}$  and the gap is  $150 \mu\text{m}$ . Photos are taken after shearing for about 45 s.

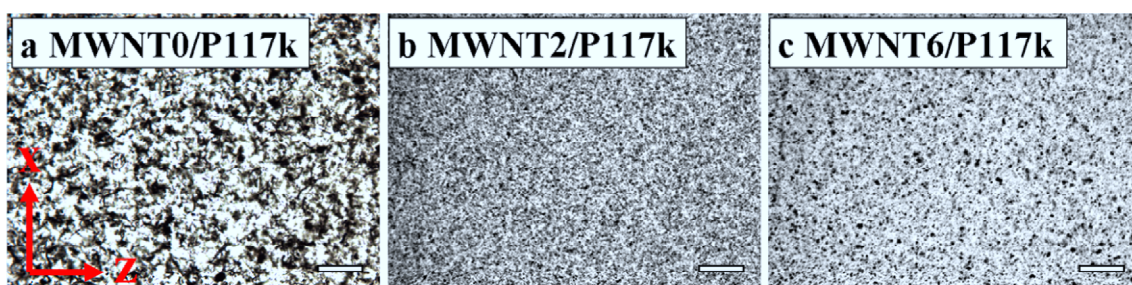

**Fig. S23** Structures of 0.5 wt % MWNT0/P117k (a), 0.5 wt % MWNT2/P117k (b) and 0.5 wt % MWNT6/P117k (c) under a shear rate of  $0.01 \text{ s}^{-1}$ . The scale bars are  $150 \mu\text{m}$  and the gap is  $150 \mu\text{m}$ . Photos are taken after shearing for about 45 s.

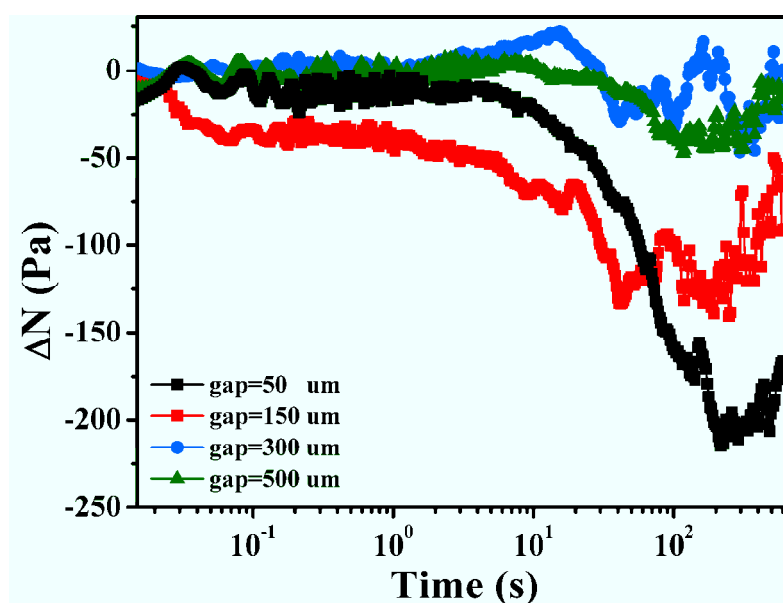

**Fig. S24** Normal stress differences ( $\Delta N$ ) versus time at  $\dot{\gamma} = 0.01 \text{ s}^{-1}$  for 1 wt % MWNT0/P28k under the gap of 50, 150, 300 and 500  $\mu\text{m}$ .

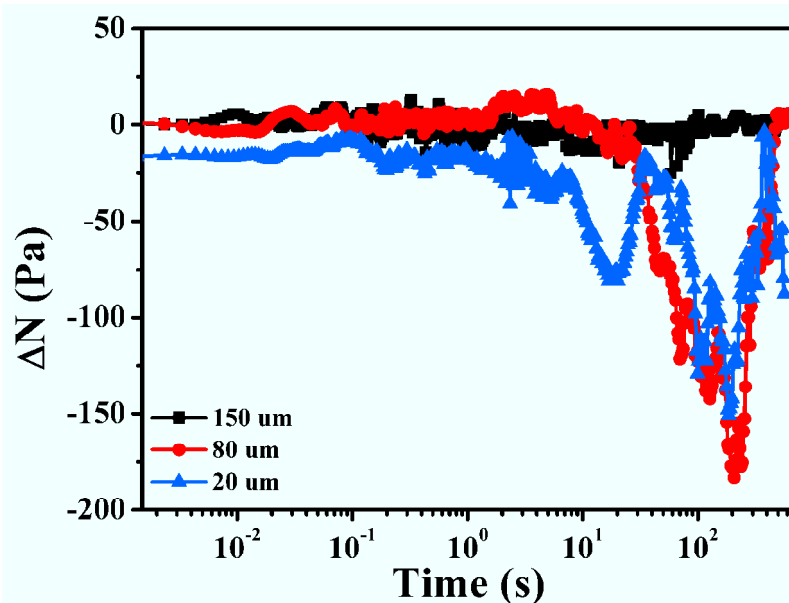

**Fig. S25** Normal stress differences ( $\Delta N$ ) versus time at  $\dot{\gamma} = 0.01 \text{ s}^{-1}$  for 0.5 wt % MWNT0/P63k under the gap of 150, 80 and 20  $\mu\text{m}$ .

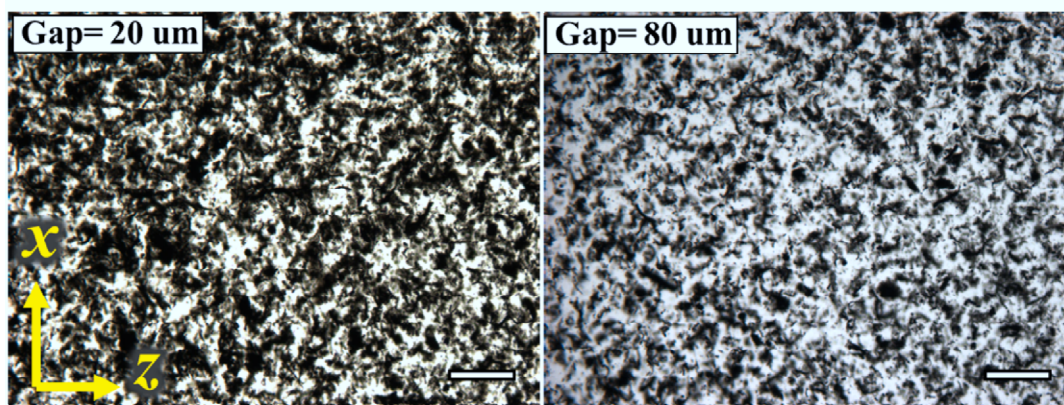

**Fig. S26** Structures of 0.5 wt % MWNT0/P117k with the gap of 80 and 20  $\mu\text{m}$  at a shear rate of  $0.01 \text{ s}^{-1}$ . The scale bars are 150  $\mu\text{m}$ . Photos are taken after shearing for 150 s.



### Average aggregate size of MWNTs in MWNT/PDMS composites

**Table S1** Mean aggregate size of 0.5 wt % MWNT/PDMS composites

| MWNT0/PDMS  | $R_0$ ( $\mu\text{m}$ ) | MWNT2/PDMS  | $R_0$ ( $\mu\text{m}$ ) | MWNT6/PDMS  | $R_0$ ( $\mu\text{m}$ ) |
|-------------|-------------------------|-------------|-------------------------|-------------|-------------------------|
| MWNT0/P6k   | 96.2                    | MWNT2/P6k   | 26.5                    | MWNT6/P6k   | 19.0                    |
| MWNT0/P28k  | 66.4                    | MWNT2/P28k  | 22.4                    | MWNT6/P28k  | 16.8                    |
| MWNT0/P63k  | 48.9                    | MWNT2/P63k  | 19.9                    | MWNT6/P63k  | 9.1                     |
| MWNT0/P117k | 30.4                    | MWNT2/P117k | 9.7                     | MWNT6/P117k | 7.5                     |

**Table S2** Mean aggregate size of 2 wt % MWNT2/PDMS and 4 wt % MWNT6/PDMS composites

| 2 wt % MWNT2/PDMS  | $R_0$ ( $\mu\text{m}$ ) | 4 wt % MWNT6/PDMS  | $R_0$ ( $\mu\text{m}$ ) |
|--------------------|-------------------------|--------------------|-------------------------|
| 2 wt % MWNT2/P6k   | 68.4                    | 4 wt % MWNT6/P6k   | 50.3                    |
| 2 wt % MWNT2/P28k  | 58.1                    | 4 wt % MWNT6/P28k  | 44.6                    |
| 2 wt % MWNT2/P63k  | 27.0                    | 4 wt % MWNT6/P63k  | 36.3                    |
| 2 wt % MWNT2/P117k | 20.1                    | 4 wt % MWNT6/P117k | 17.6                    |

## Steady shear results of pure PDMS

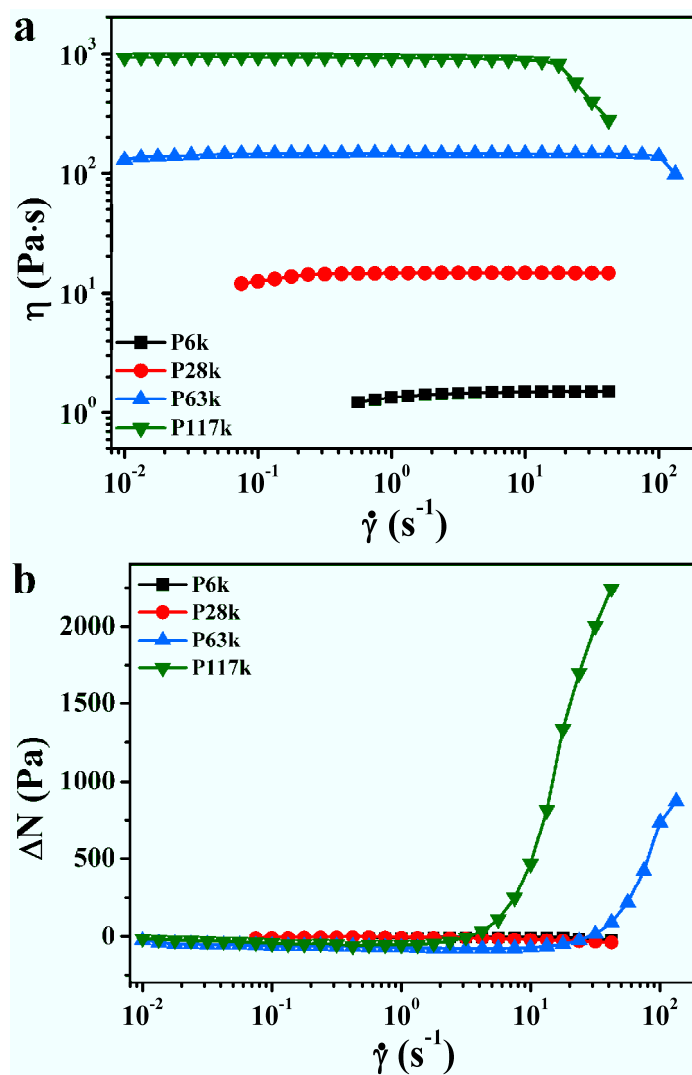

**Fig. S27** Viscosity (a) and normal stress differences (b) versus shear rate for pure PDMS with different molecular weights. The gap in the rheological experiments is about 0.9 mm.

S1 K. Nishinari, *Prog. Colloid Polym. Sci.*, 2009, **136**, 87–94.

S2 R. Krishnamoorti and E. P. Giannelis, *Macromolecules*, 1997, **30**, 4097–4102.

S3 A. K. Kota, B. H. Cipriano, M. K. Duesterberg, A. L. Gershon, D. Powell, S. R. Raghavan and H. A. Bruck, *Macromolecules*, 2007, **40**, 7400–7406.
